# Supplementary material for: Mutation-induced rigidity in the Fyn SH2 domain enhances pY-binding affinity at the cost of peptide specificity
Source: Royal Society of Chemistry journal article supplement (doi:10.1039/d5cp00015g), 2025-01-01
Supplement: d5cp00015g1.pdf [file d5cp00015g1.pdf]

# Mutation-Induced Rigidity in the Fyn SH2 Domain Enhances pY- Binding Affinity at the Cost of Peptide Specificity

## Supplementary information

*Li Deng,<sup>a</sup> Yang Zou,<sup>a</sup> Junbao Zhu,<sup>b</sup> Lei Li<sup>a\*</sup> and Yanting Wang<sup>c,d\*</sup>*

<sup>a</sup> School of Health and Life Sciences, University of Health and Rehabilitation Sciences, 369 Dengyun Road, Qingdao, 266071, China

<sup>b</sup> College of Life Sciences, Qingdao University, 308 Ningxia Road, Qingdao, 266071, China

<sup>c</sup> Institute of Theoretical Physics, Chinese Academy of Sciences, 55 East Zhongguancun Road, P. O. Box 2735, Beijing, 100190, China

<sup>d</sup> School of Physical Sciences, University of Chinese Academy of Sciences, 19 Yuquan Road, Beijing, 100049, China

\*Corresponding Authors (Lei Li, email: lilei@uhrs.edu.cn; Yanting Wang, email: wangyt@itp.ac.cn)

**Table S1.** Secondary-structure names and corresponding one-symbol label used in DSSP and this work.

| Secondary structure name                          | Label in DSSP | Label in this work |
|---------------------------------------------------|---------------|--------------------|
| Alpha-helix                                       | H             | H                  |
| Residue in an isolated beta-bridge                | B             | D                  |
| Extend strand that participates in<br>beta-ladder | E             | E                  |
| 3 <sub>10</sub> -helix                            | G             | G                  |
| pi-helix                                          | I             | I                  |
| kappa-helix                                       | P             | P                  |
| Bend                                              | S             | S                  |
| Hydrogen-bonded turn                              | T             | T                  |
| Loop                                              | ~             | K                  |

**Table S2.** Number of sites in different regions with different secondary structures between the crystal structure of the wild-type Fyn SH2 (PDB id: 1AOT) and the predicted structure of its mutant.

| Name of regions | Region    | Length | Type         | Number of sites with different secondary structures |
|-----------------|-----------|--------|--------------|-----------------------------------------------------|
| N-terminal      | [1-13]    | 13     | Unstructured | 8                                                   |
| $\alpha$ A      | [14-22]   | 9      | Structured   | 1                                                   |
| ABloop          | [23-30]   | 8      | Unstructured | 4                                                   |
| $\beta$ B       | [31-35]   | 5      | Structured   | 0                                                   |
| BCloop          | [36-42]   | 7      | Unstructured | 6                                                   |
| $\beta$ C       | [43-51]   | 9      | Structured   | 3                                                   |
| CDloop          | [52-54]   | 3      | Unstructured | 0                                                   |
| $\beta$ D       | [55-65]   | 11     | Structured   | 3                                                   |
| DEloop          | [66-70]   | 5      | Unstructured | 3                                                   |
| $\beta$ E       | [71-72]   | 2      | Structured   | 0                                                   |
| EF loop         | [73-76]   | 4      | Unstructured | 0                                                   |
| $\beta$ F       | [77-79]   | 3      | Structured   | 0                                                   |
| FBloop          | [80-81]   | 2      | Unstructured | 0                                                   |
| $\alpha$ B      | [82-91]   | 10     | Structured   | 2                                                   |
| BGloop          | [92-101]  | 10     | Unstructured | 3                                                   |
| $\beta$ G       | [102-103] | 2      | Structured   | 2                                                   |
| C-terminal      | [104-106] | 3      | Unstructured | 2                                                   |
| Total number    | /         | 106    |              | 37                                                  |

*Note: Different regions are identified by dynamically stable secondary structures.*

**Table S3.** Contact domain residues for 204pY in the crystal structure and the predicted structure.

|            |     |     |     |     |     |     |     |     |     |     |     |     |
|------------|-----|-----|-----|-----|-----|-----|-----|-----|-----|-----|-----|-----|
| Fyn_SH2_WT | L12 | G13 | R14 | K15 | D16 | A17 | R34 | E35 | S36 | E37 | T38 | V39 |
|            | Y43 | A44 | L45 | S46 | K59 | H60 | Y61 | L62 | I63 | \   | D67 |     |
| Fyn_SH2_MT | L12 | G13 | R14 | K15 | \   | A17 | R34 | E35 | S36 | E37 | T38 | V39 |
|            | \   | A44 | L45 | S46 | K59 | H60 | Y61 | L62 | \   | R64 | \   |     |

**Table S4.** Contact domain residues for I207 in the crystal structure and the predicted structure.

|            |     |     |     |     |     |     |     |     |     |     |
|------------|-----|-----|-----|-----|-----|-----|-----|-----|-----|-----|
| Fyn_SH2_WT | Y61 | I73 | T74 | T75 | R76 | Y89 | A93 | G95 | L96 | S97 |
| Fyn_SH2_MT | Y61 | I73 | T74 | T75 | R76 | Y89 | A93 | G95 | L96 | S97 |

**Table S5.** Numbers of different positions among the secondary-structure sequences from initial and dynamically stable secondary structures for different systems.

| Name of regions | MT vs WT | WT_pY vs WT | MT_pY vs MT | MT_pY vs WT_pY | WT vs WT_initial | MT vs MT_initial |
|-----------------|----------|-------------|-------------|----------------|------------------|------------------|
| N-terminal      | 4        | 6           | 2           | 0              | 7                | 4                |
| $\alpha$ A      | 0        | 0           | 0           | 0              | 0                | 1                |
| ABloop          | 6        | 5           | 0           | 3              | 4                | 2                |
| $\beta$ B       | 0        | 0           | 0           | 0              | 0                | 0                |
| BCloop          | 2        | 2           | 0           | 0              | 7                | 0                |
| $\beta$ C       | 0        | 0           | 0           | 0              | 3                | 0                |
| CDloop          | 0        | 0           | 0           | 0              | 0                | 0                |
| $\beta$ D       | 0        | 0           | 0           | 0              | 3                | 0                |
| DEloop          | 0        | 2           | 0           | 0              | 5                | 2                |
| $\beta$ E       | 0        | 0           | 0           | 0              | 0                | 0                |
| EF loop         | 0        | 2           | 0           | 0              | 0                | 0                |
| $\beta$ F       | 0        | 3           | 0           | 1              | 0                | 2                |
| FBloop          | 0        | 0           | 0           | 0              | 0                | 0                |
| $\alpha$ B      | 0        | 0           | 0           | 0              | 2                | 0                |
| BGloop          | 4        | 5           | 2           | 5              | 3                | 6                |
| $\beta$ G       | 2        | 0           | 0           | 2              | 2                | 0                |
| C-terminal      | 0        | 0           | 2           | 1              | 0                | 2                |
| Total number    | 18       | 25          | 6           | 12             | 36               | 19               |

*Note: In the table, the dynamically stable secondary structure of Fyn\_SH2\_WT is referred to by WT, Fyn\_SH2\_MT by MT, Fyn\_SH2\_WT+pYEEI by WT\_pY, Fyn\_SH2\_MT+pYEEI by MT\_pY, Fyn\_SH2\_WT by WT\_initial, and Fyn\_SH2\_MT by MT\_initial.*

**Table S6.** Hydrogen bonds between the domain and the pY-peptide with occupancy greater than 60%.

| Hydrogen bond |             | Occupancy (%)    |                  |
|---------------|-------------|------------------|------------------|
| Donor         | Acceptor    | Fyn_SH2_WT+pYEEI | Fyn_SH2_MT+pYEEI |
| ARG34-Side    | PTR204-Side | 91.2             | 96.2             |
| GLU37-Main    | PTR204-Side | 66.5             | 92.1             |
| GLU205-Main   | HIS60-Main  | 35.1             | 84.9             |
| THR38-Side    | PTR204-Side | 28.6             | 76.5             |
| SER36-Side    | PTR204-Side | 78.6             | 63.6             |

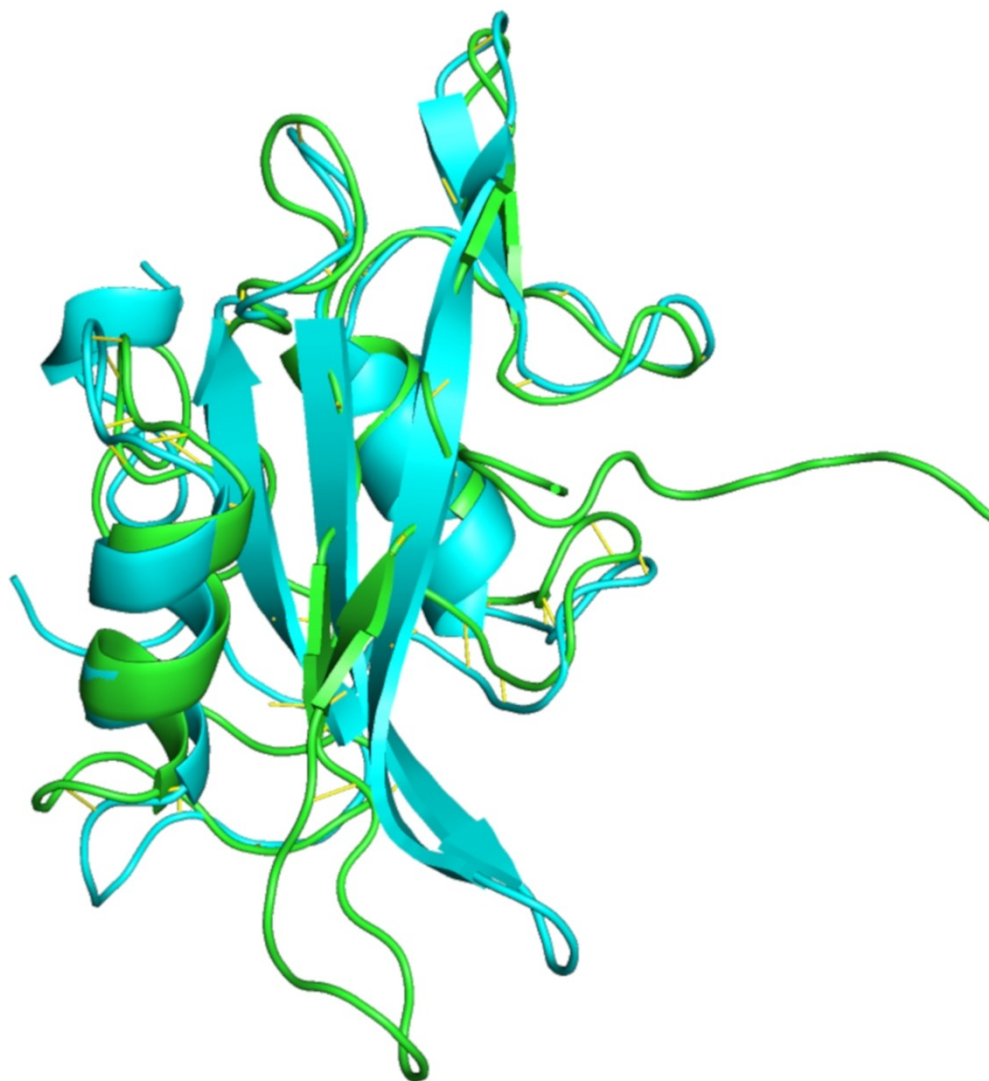

**Figure S1.** Aligned mutant (colored in blue) and wild-type (colored in green) structures.

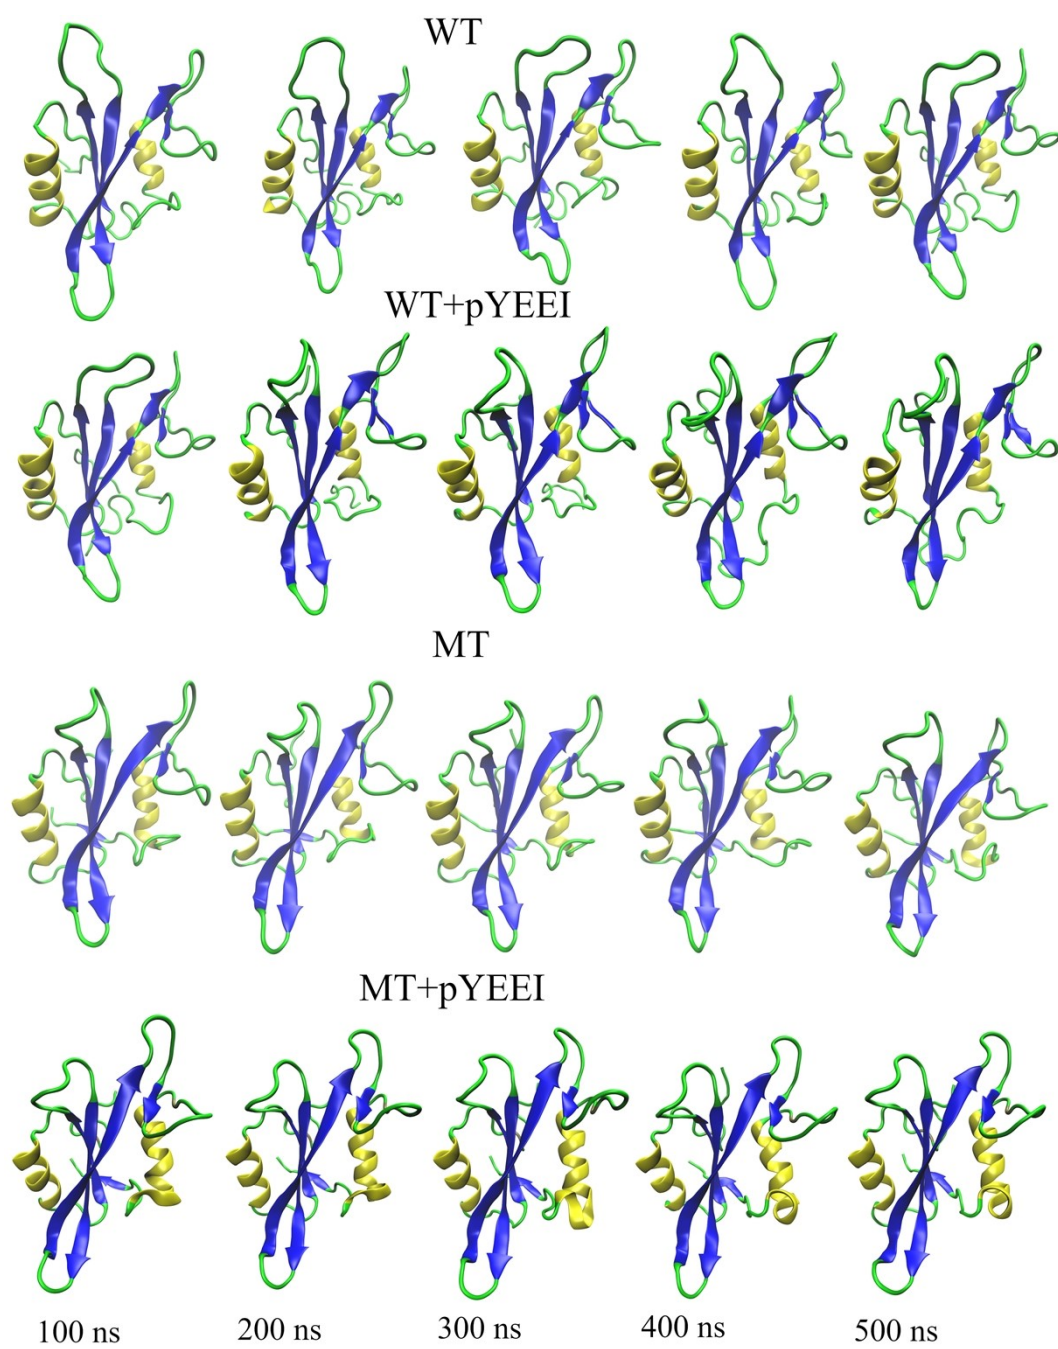

**Figure S2.** Conformations sampled from different systems with the interval of 100 ns.



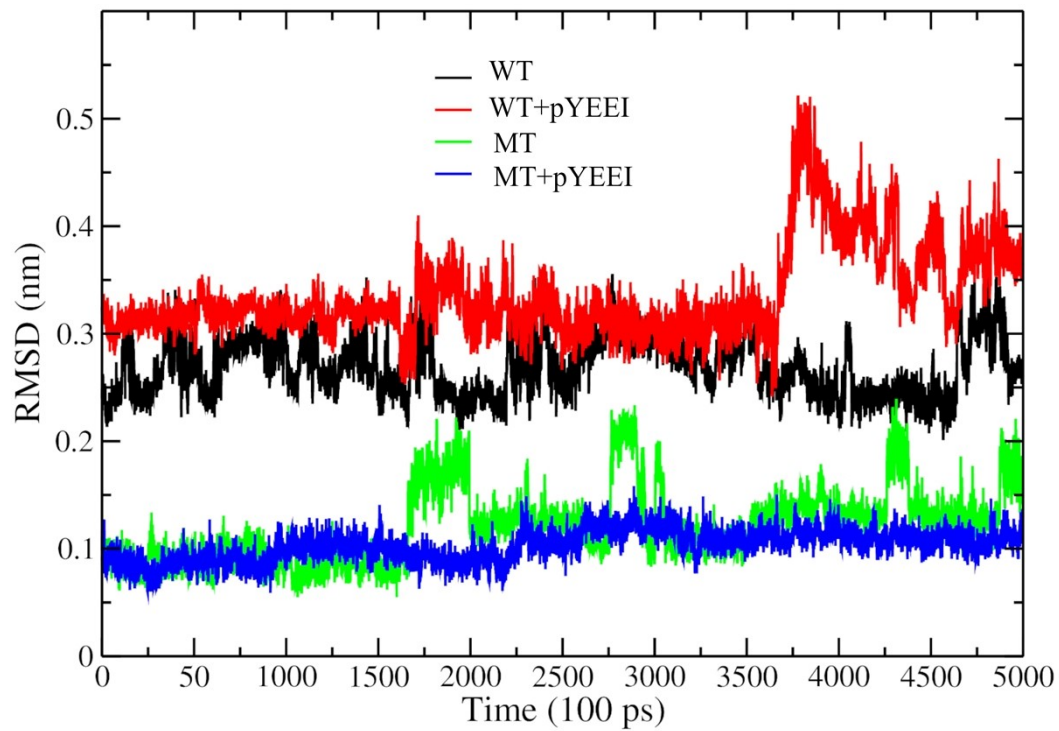

**Figure S3.** RMSDs of the SH2 domain for different systems.

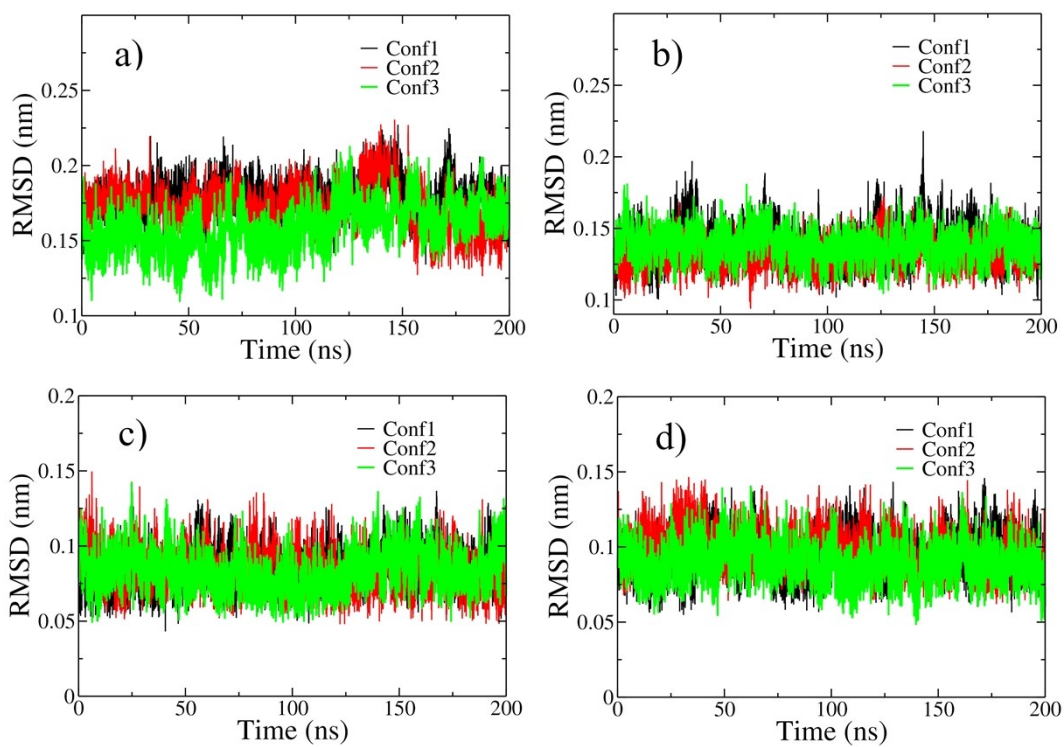

**Figure S4.** RMSDs of the SH2 domain in 200-ns simulations with different initial structures. a) The wild-type Fyn SH2 monomer. b) The wild-type Fyn SH2 complexed with pYEEI. c) The mutant Fyn SH2 monomer. d) The mutant Fyn SH2 complexed with pYEEI.

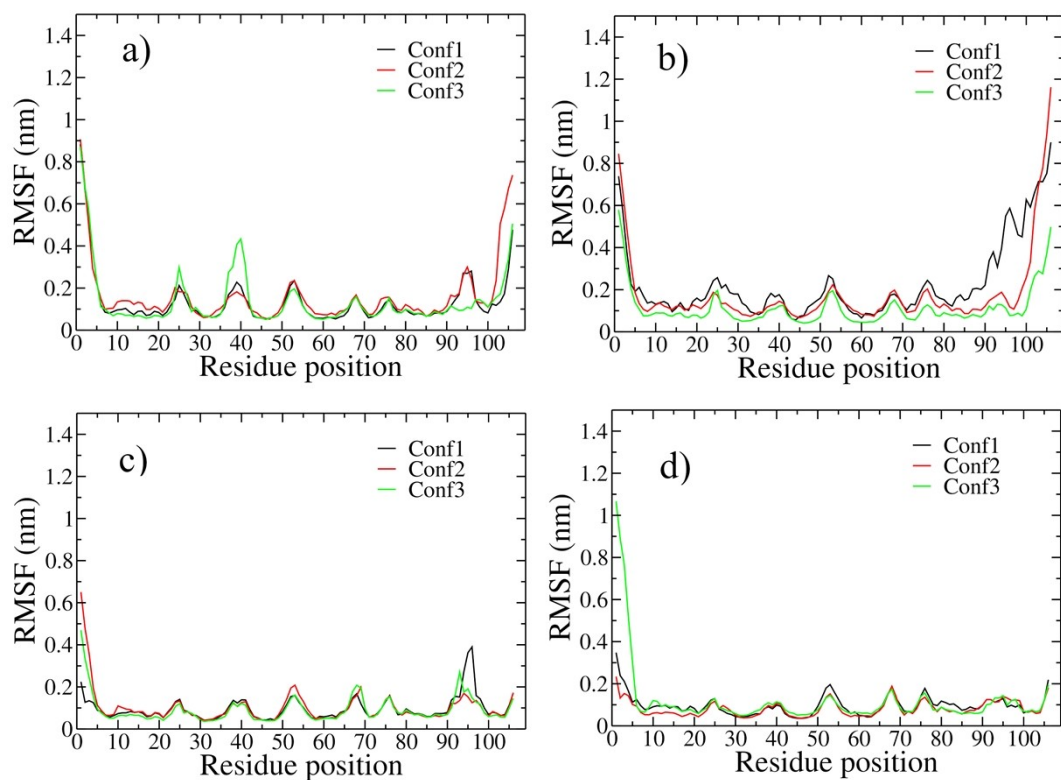

**Figure S5.** RMSFs of the SH2 domain in 200-ns simulations with different initial structures. a) The wild-type Fyn SH2 monomer. b) The wild-type Fyn SH2 complexed with pYEEI. c) The mutant Fyn SH2 monomer. d) The mutant Fyn SH2 complexed with pYEEI.

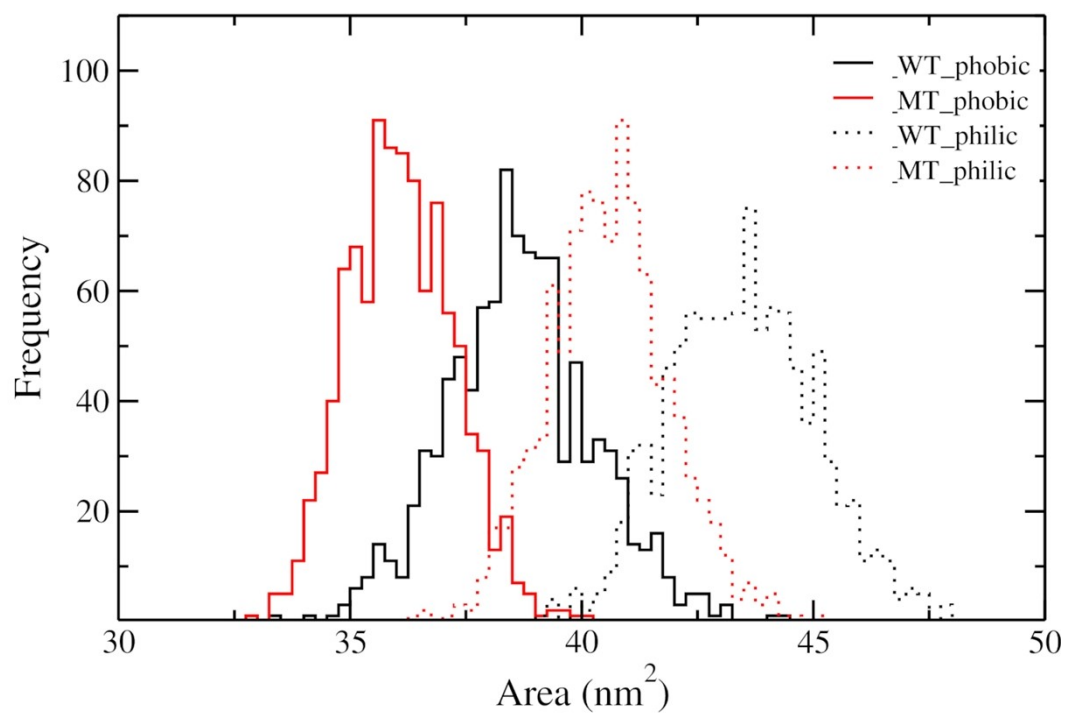

**Figure S6.** Hydrophobic and hydrophilic SASAs of the wild-type and mutant complexes.

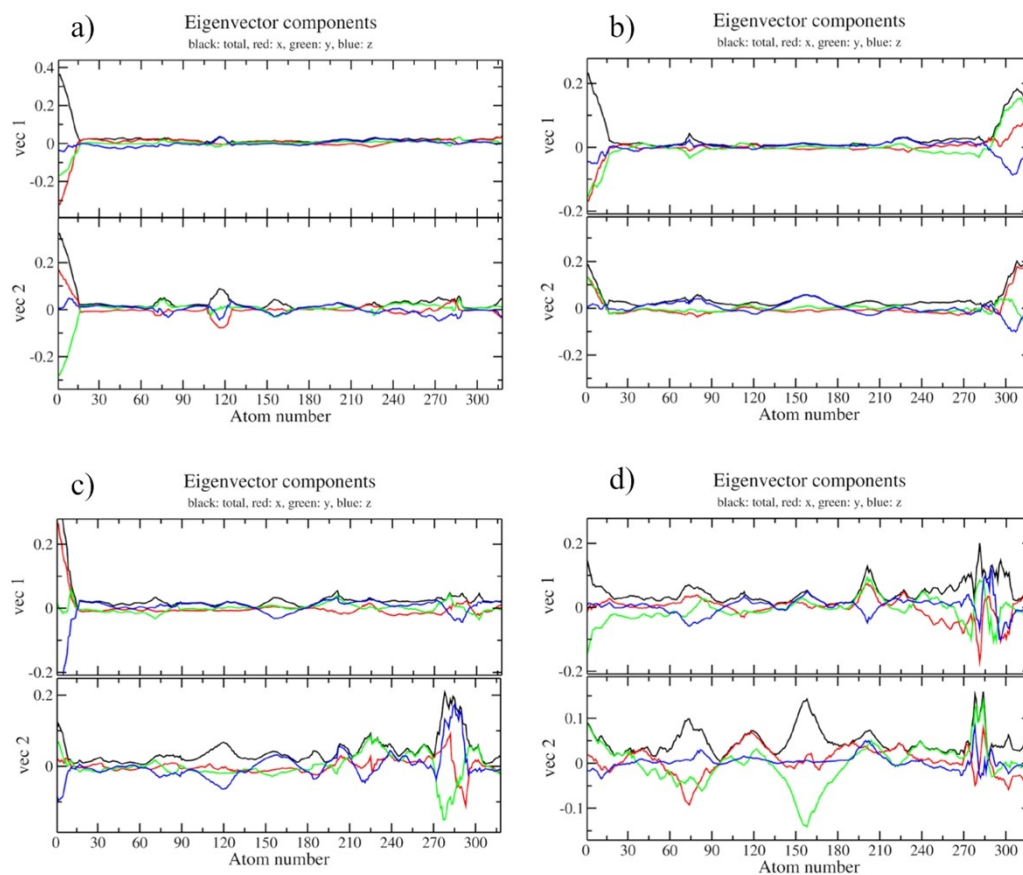

**Figure S7.** Eigenvector components of PC1 and PC2 for the isolated wild-type Fyn SH2 (a), wild-type Fyn SH2 complex (b), isolated mutant (c), and mutant complex (d).

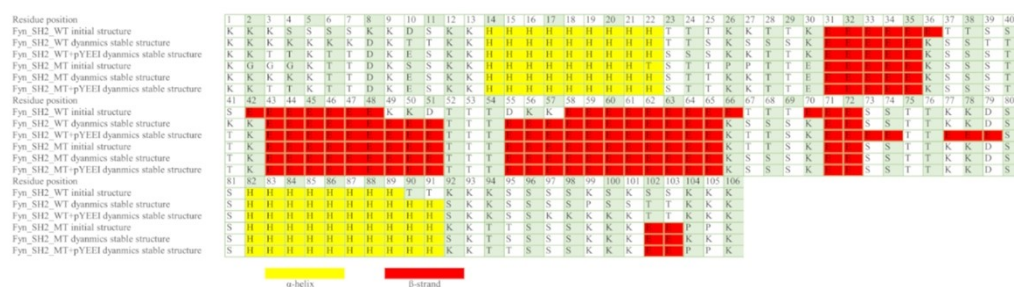

**Figure S8.** Secondary-structure sequences obtained by various methods for the wild-type and mutant systems.

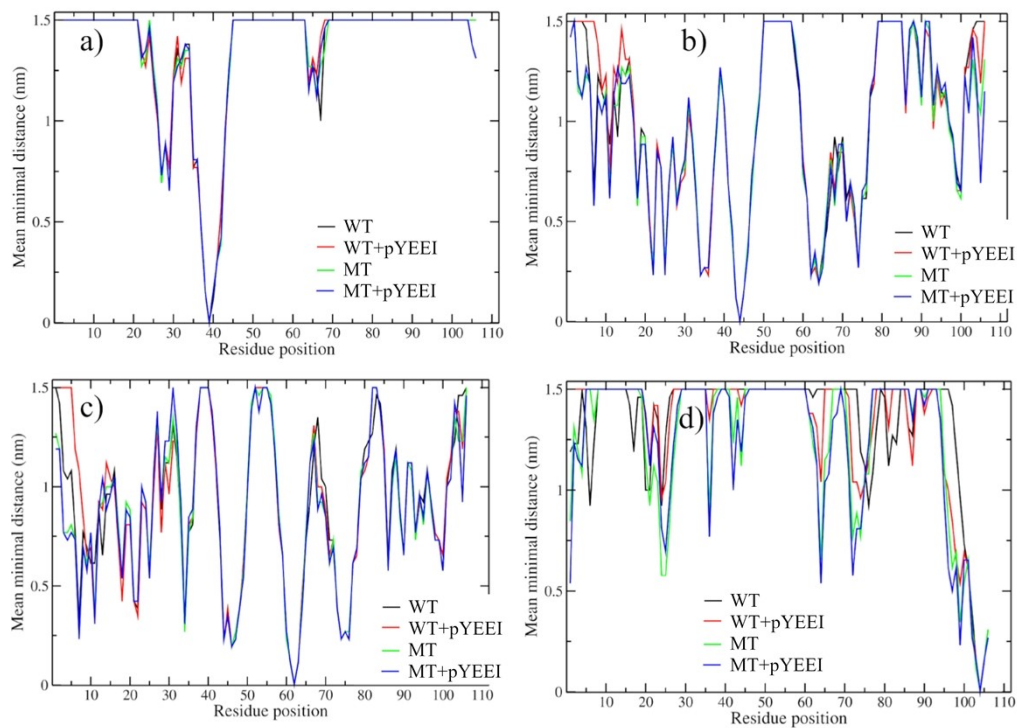

**Figure S9.** Distances of residues T39/V39 (a), S44/A44 (b), K62/L62 (c), and S104 (d) in the domain from other residues for all the four systems.

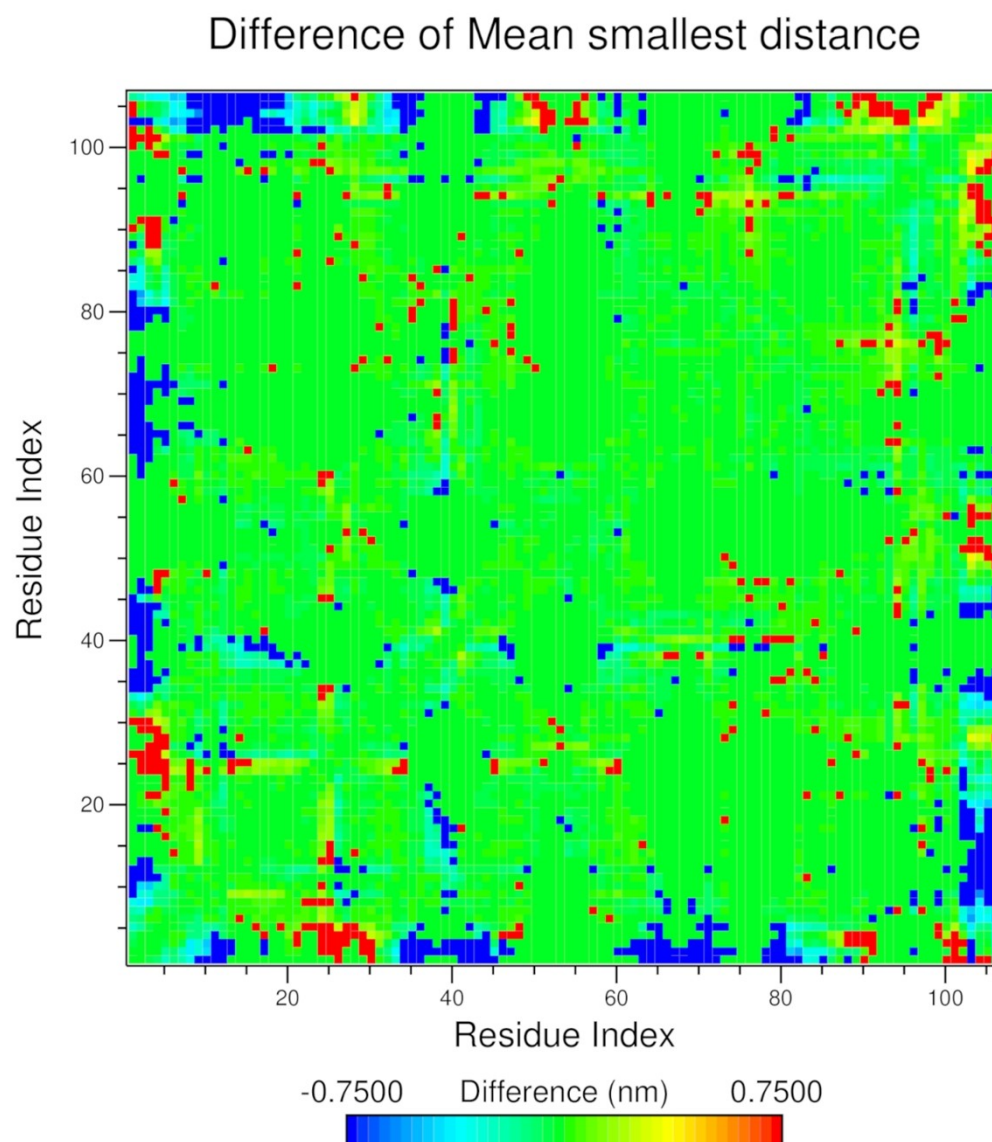

**Figure S10.** Difference of the contact maps between the isolated wild-type Fyn SH2 and the mutant.



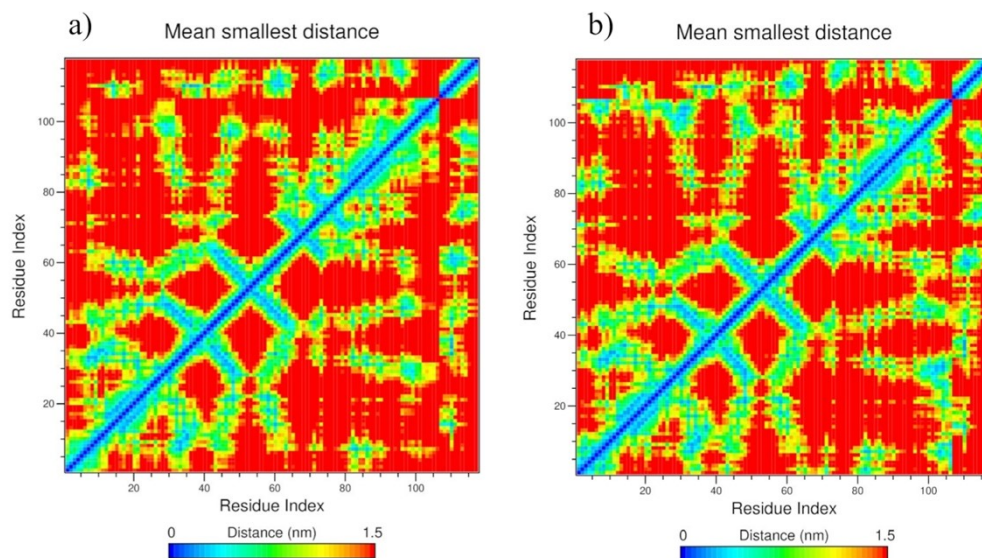

**Figure S11.** Residue-residue contact maps of the complex for the wild-type Fyn SH2 (a), and the mutant (b).

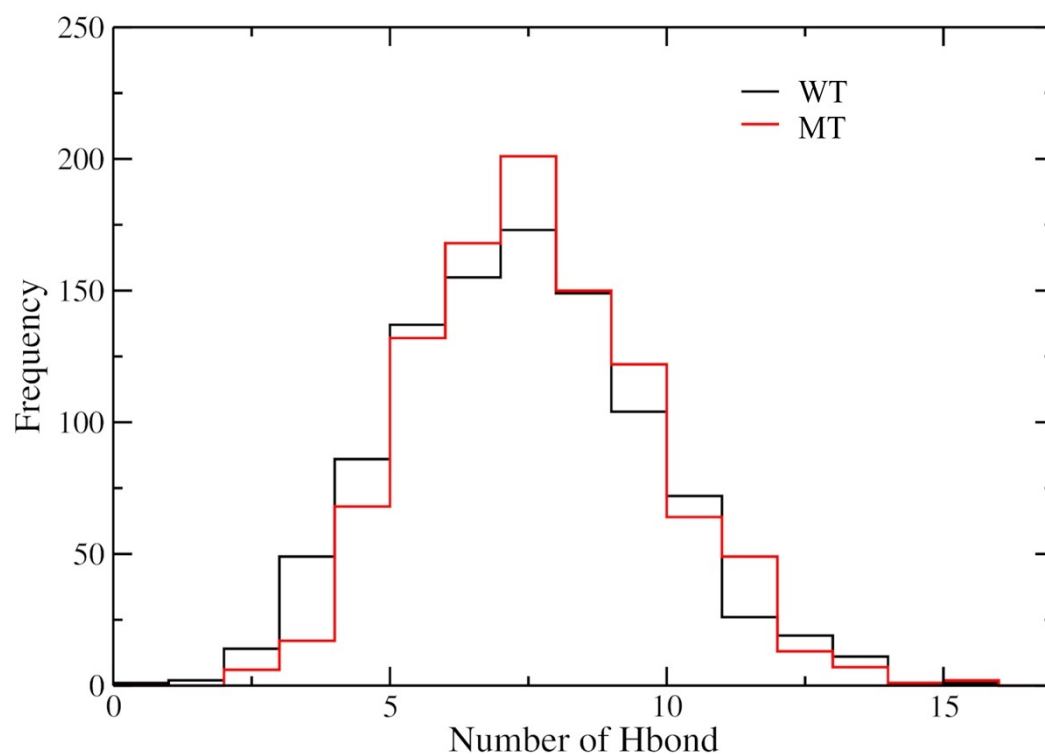

**Figure S12.** Frequencies of hydrogen bonds between the domain and the pY-peptide for the wild-type and mutant complex systems.

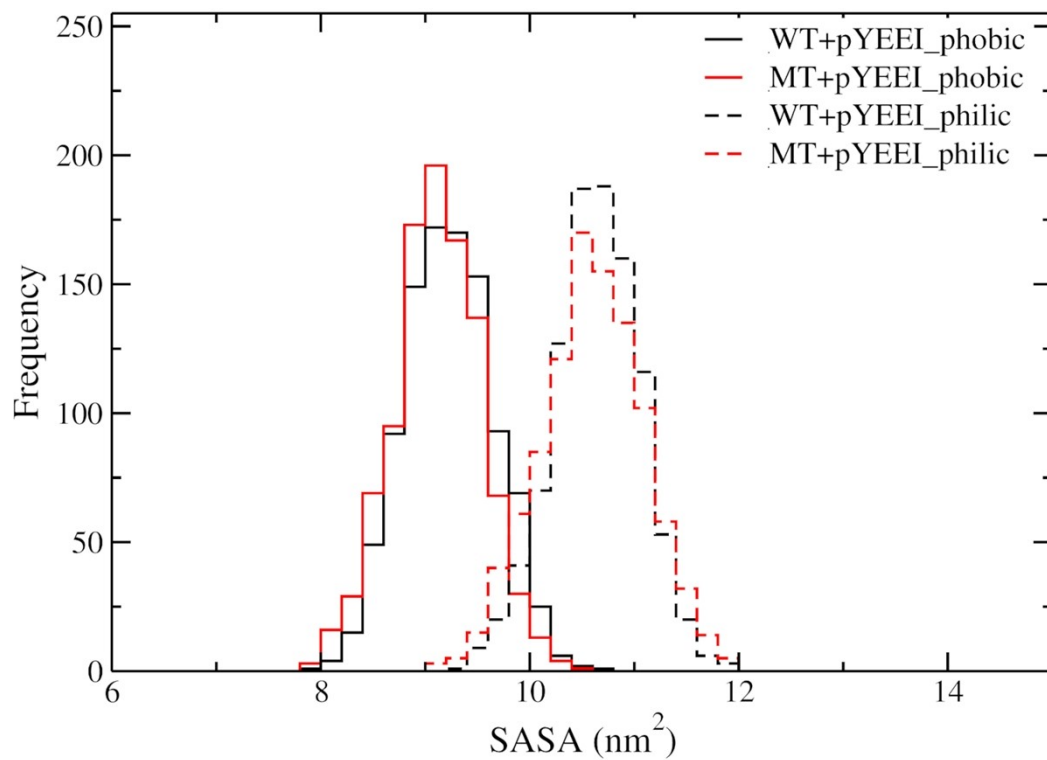

**Figure S13.** Total hydrophobic and hydrophilic contact surfaces between the domain and the pY-peptide for the wild-type and mutant complex systems.

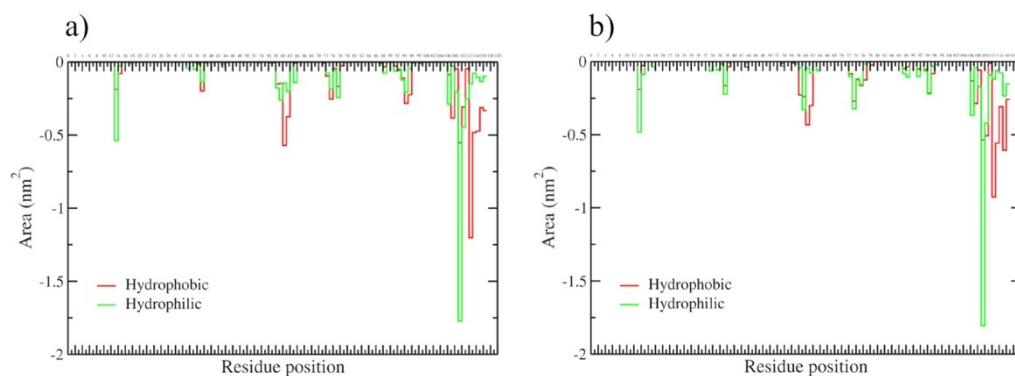

**Figure S14.** Hydrophobic and hydrophilic contact surfaces for each residue of the domain and the pY-peptide for the wild-type (a) and mutant (b) complex systems.

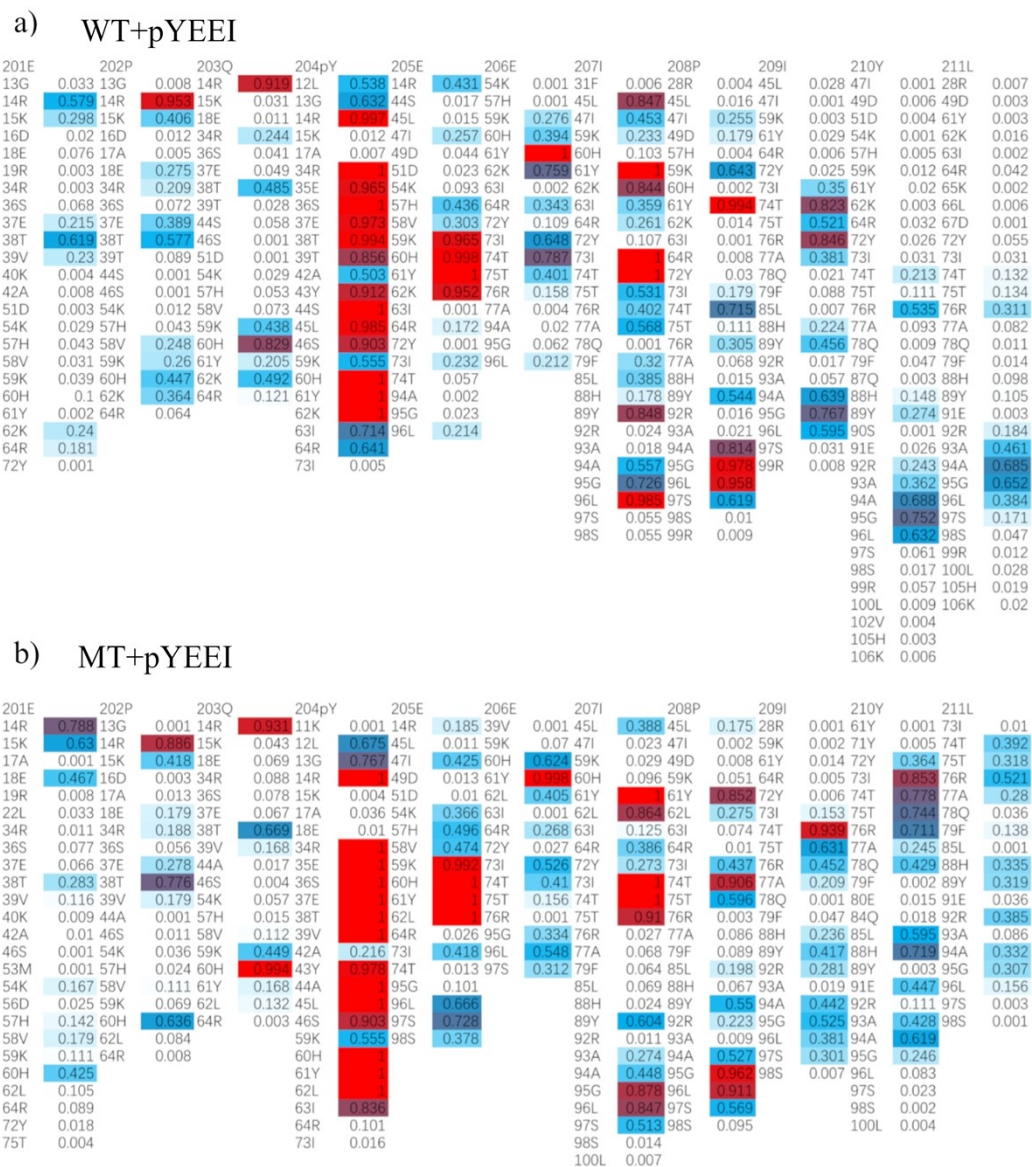

**Figure S15.** List of the contact protein residues and their occupancies for each pY-peptide residue in the wild-type (a) and the mutant (b) complex systems. To visualize different contact stabilities, the occupancies greater than 0.6 are colored with gradually fading red reflecting the decrease of the value, and blue for those greater than 0.1 and less than 0.6.
